# Supplementary material for: Development of carboximidamide small molecule nanogels as potent antimicrobial functional drug delivery systems
Source: Royal Society of Chemistry journal article supplement (doi:10.1039/d5ra05150a), 2025-01-01
Supplement: d5ra05150a1.pdf [file d5ra05150a1.pdf]

## Supporting materials

### Development of Carboximidamide Small Molecule Nanogels As Potent Antimicrobial Functional Drug Delivery Systems

Basmah Almohaywi<sup>a</sup>, Mohammed H. Elkomy<sup>b,c</sup>, Mohamed A. M. Ali<sup>d</sup>, Ahmed K. B. Aljohani<sup>e</sup>, Mohammed S. Abdulrahman<sup>f</sup>, Mohamed M. Elsebaie<sup>g\*</sup>, Alaa M. Alhammad<sup>h</sup>, Khadijah A. Aytah<sup>h</sup>, Seba M. Alshehri<sup>h</sup>, Elaaf O. Alharbi<sup>i</sup>, Rama R. Alharbi<sup>h</sup>, and Hany E.A. Ahmed<sup>g\*</sup>

<sup>a</sup>Department of Pharmaceutical Chemistry, College of Pharmacy, King Khalid University, Abha 61421, Saudi Arabia

<sup>b</sup>Department of Pharmaceutics, College of Pharmacy, Jouf University, Sakaka, Aljouf 72341, Saudi Arabia

<sup>c</sup>Center for Health Research and Innovations, Deanship of Graduate Studies and Scientific Research, Jouf University, Sakaka 72388, Saudi Arabia

<sup>d</sup>Department of Biology, College of Science, Imam Mohammad Ibn Saud Islamic University (IMSIU), Riyadh 11623, Saudi Arabia

<sup>e</sup>Pharmacognosy and Pharmaceutical Chemistry Department, Pharmacy College, Taibah University, Al-Madinah Al-Munawarah 42353, Saudi Arabia

<sup>f</sup>Microbiology and Immunology Department, Faculty of Pharmacy, Al-Azhar University, Nasr City 11884, Cairo, Egypt

<sup>g</sup>Pharmaceutical Organic Chemistry Department, Faculty of Pharmacy, Al-Azhar University, Nasr City 11884, Cairo, Egypt

<sup>h</sup>Pharmacy Student, Pharmacy College, Taibah University, Al-Madinah Al-Munawarah 42353, Saudi Arabia

<sup>i</sup>Pharmacy Graduate, Pharmacy College, Taibah University, Al-Madinah Al-Munawarah 42353, Saudi Arabia

\*Corresponding author: Hany E. A. Ahmed, Mohamed M. Elsebaie

*E-mail address:* [heahmad@azhar.edu.eg](mailto:heahmad@azhar.edu.eg), [m.elsebaei@azhar.edu.eg](mailto:m.elsebaei@azhar.edu.eg)

## Experimental part and NMR and HPLC spectra

**Table S1:** Molecular compounds with corresponding molecular weights.

|   | Code | Structure                                                                         | MWt |
|---|------|-----------------------------------------------------------------------------------|-----|
| 1 | ACE  | 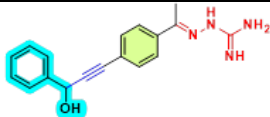 | 306 |
| 2 | TRZS |  | 373 |
| 3 | TRZO |  | 379 |

### 1.1. Chemistry of compounds

**ACE:** **2-(1-(4-(3-Hydroxy-3-phenylprop-1-yn-1-yl)phenyl)ethylidene)hydrazine-1-carboximidamide (1).** Light brown solid (85 mg, 69%); mp 183-185 °C. <sup>1</sup>H NMR (DMSO-*d*<sub>6</sub>); δ 7.97 (d, *J* = 7.6 Hz, 2H), 7.85 (d, *J* = 7.4 Hz, 2H), 7.81-7.33 (m, 5H), 6.24 (brs, 1H), 6.02 (brs, 2H), 5.86 (brs, 2H), 5.51 (s, 1H), 2.22 (s, 3H); <sup>13</sup>C NMR (DMSO-*d*<sub>6</sub>); δ 159.9, 144.7, 135.7, 131.2, 129.1, 127.6, 127.2, 126.0, 121.9, 120.6, 92.5, 87.6, 67.5, 21.4; MS *m/z* (%): 306 (M<sup>+</sup>, 65.37); Anal. Calc. for: C<sub>18</sub>H<sub>18</sub>N<sub>4</sub>O (306): C, 70.57; H, 5.92; N, 18.29%; Found: C, 70.67; H, 6.07; N, 18.01%.

**TRZS:** **2-(1-(4-methyl-2-(4-(phenylethynyl)phenyl)thiazol-5-yl)ethylidene)hydrazine-1-carboximidamide (2):** Yellow solid (205 mg, 87%); mp = 190–192 °C. <sup>1</sup>H NMR (DMSO-*d*<sub>6</sub>) δ: 11.19 (brs, 1H), 7.98 (d, *J* = 8.9 Hz, 2H), 7.70 (d, *J* = 8.7 Hz, 2H), 7.58 (d, *J* = 8 Hz, 2H), 7.46 (m, 3H), 7.44 (brs, 3H), 2.63 (s, 3H), 2.43 (s, 3H). <sup>13</sup>C NMR (DMSO-*d*<sub>6</sub>) δ: 163.68, 155.96, 152.42, 146.94, 132.37, 132.08, 131.32, 128.96, 128.68, 126.08, 124.06, 121.86, 121.86, 91.48, 88.73,

17.95, 17.90; HRMS (EI)  $m/z$  373.1358  $M^+$ , calc. for  $C_{21}H_{19}N_5S$  373.1361; Anal. Calc. for:  $C_{21}H_{19}N_5S$  (373): C, 67.54; H, 5.13; N, 18.75%; Found: C, 67.55; H, 5.12; N, 18.74%.

**TRZO:**      **2-(1-(1-(4-((1-Hydroxycyclohexyl)ethynyl)phenyl)-5-methyl-1*H*-1,2,3-triazol-4-yl)ethylidene) hydrazine-1-carboximidamide** . Brown solid (110 mg, 77%); mp 223-224 °C.  $^1H$  NMR ( $DMSO-d_6$ );  $\delta$  8.12 (d,  $J$  = 8.2 Hz, 2H), 7.81 (d,  $J$  = 8.2 Hz, 2H), 6.22 (brs, 1H), 6.02 (brs, 4H), 2.65 (s, 3H), 2.26 (s, 3H), 2.20-1.15 (m, 10H);  $^{13}C$  NMR ( $DMSO-d_6$ );  $\delta$  159.81, 155.76, 152.52, 149.00, 137.20, 136.12, 132.23, 126.93, 117.66, 93.05, 87.29, 58.38, 37.26, 29.23, 25.19, 21.47, 17.68, 16.25; MS  $m/z$  (%): 379 ( $M^+$ , 79.67); purity *via* HPLC = 99.01%; Anal. Calc. for:  $C_{20}H_{25}N_7O$  (379): C, 63.30; H, 6.64; N, 25.84%; Found: C, 63.41; H, 6.72; N, 25.77%.

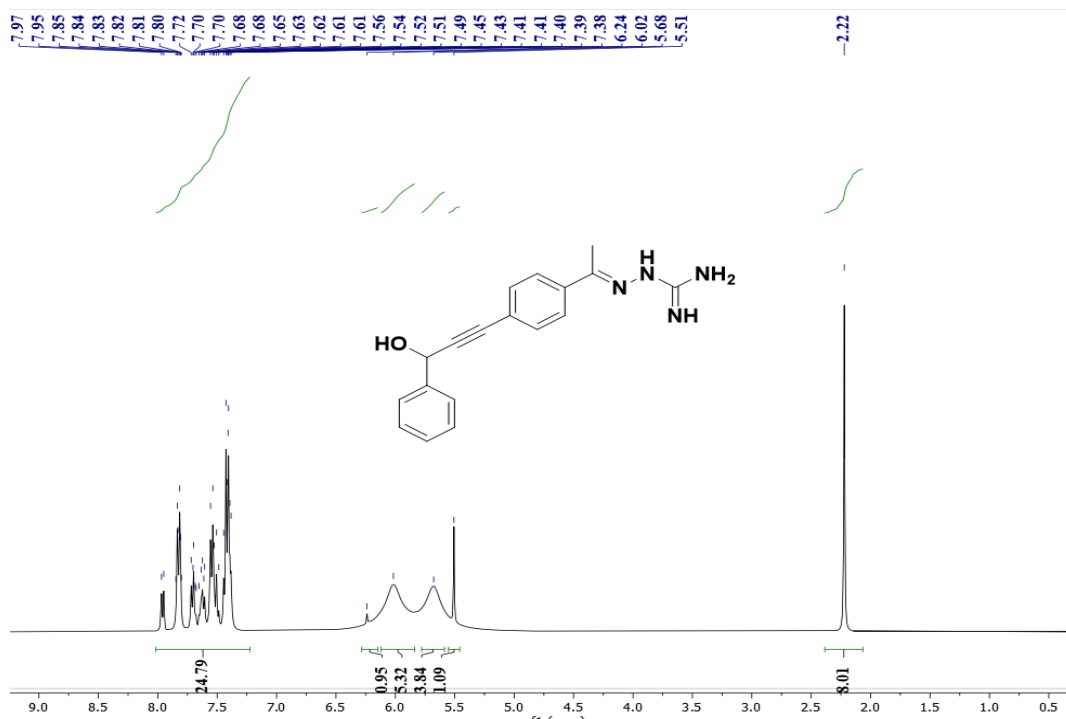

**Figure S1: <sup>1</sup>H NMR data of compound ACE**

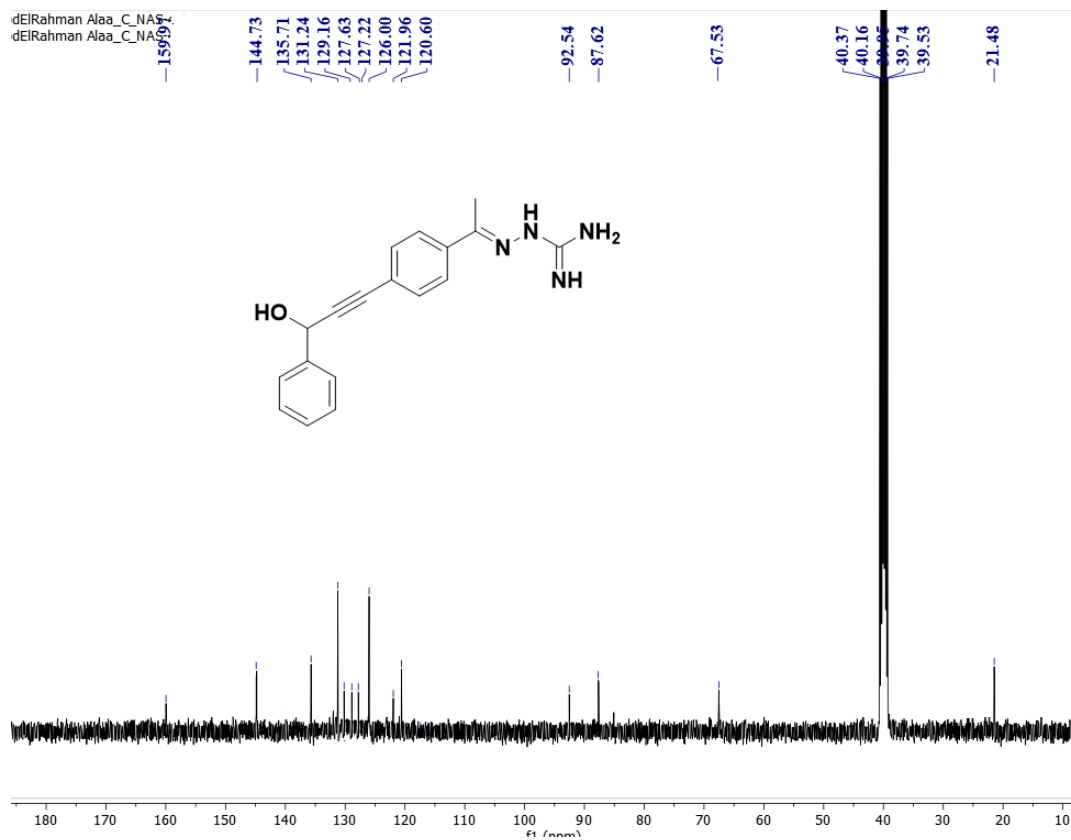

**Figure S2: <sup>13</sup>C NMR data of compound ACE**

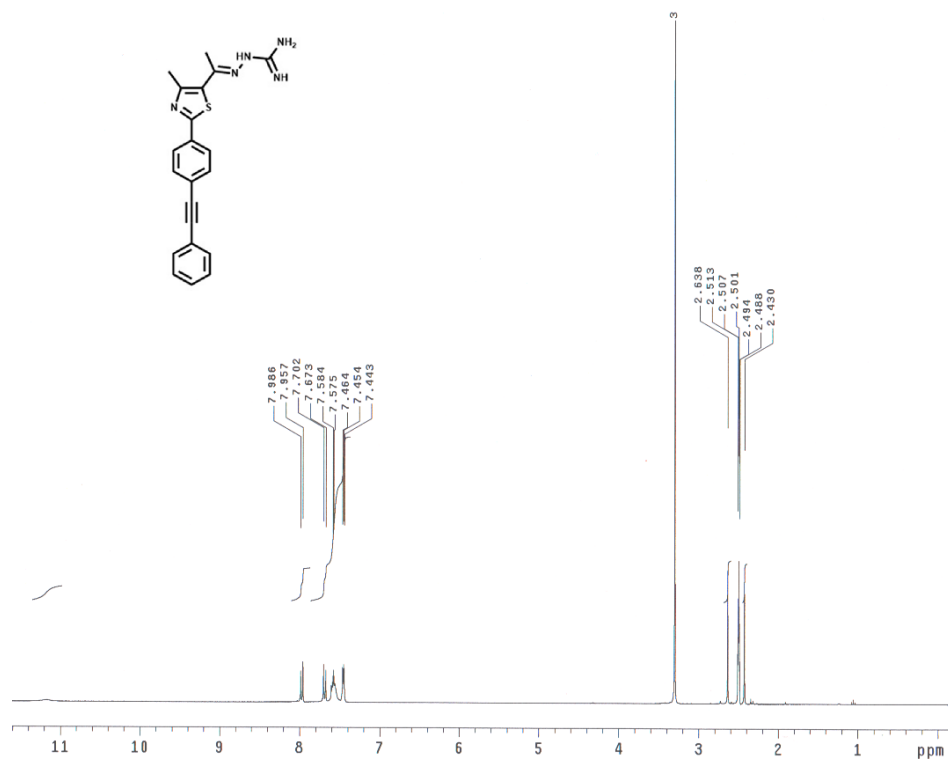

**Figure S3:** HNMR data of compound TRZS

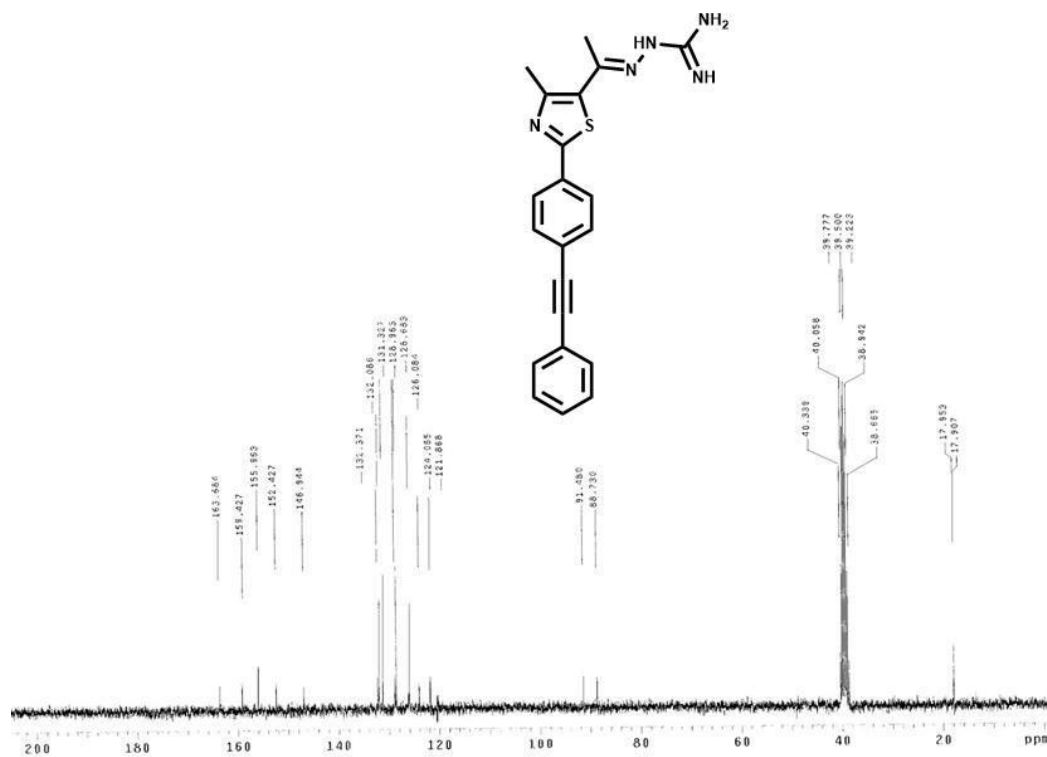

**Figure S4:** CNMR data of compound TRZS

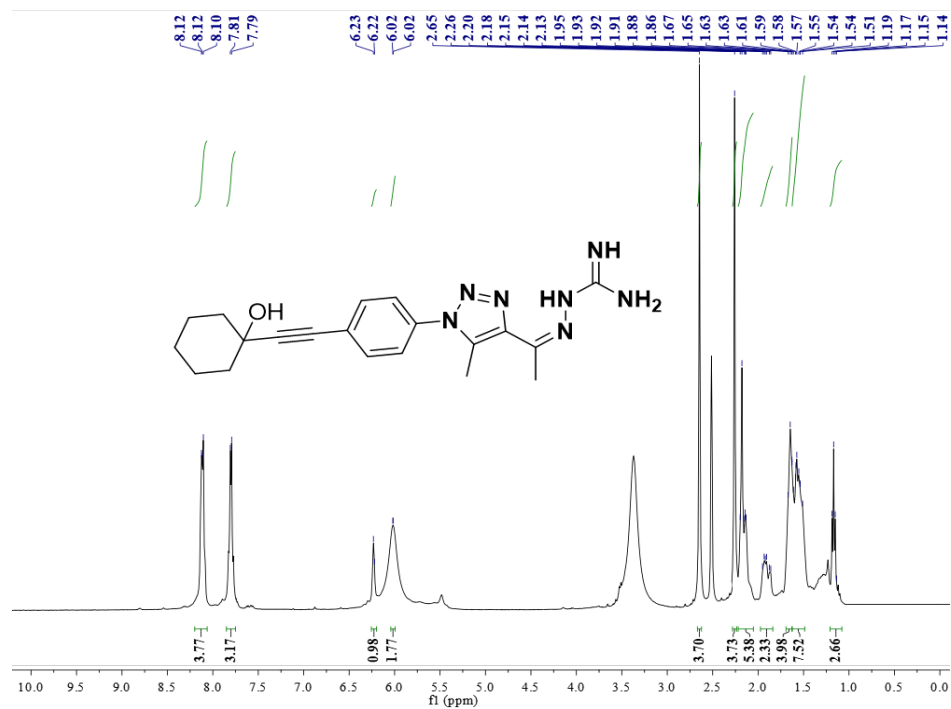

**Figure S5:** <sup>1</sup>H NMR data of compound TRZO

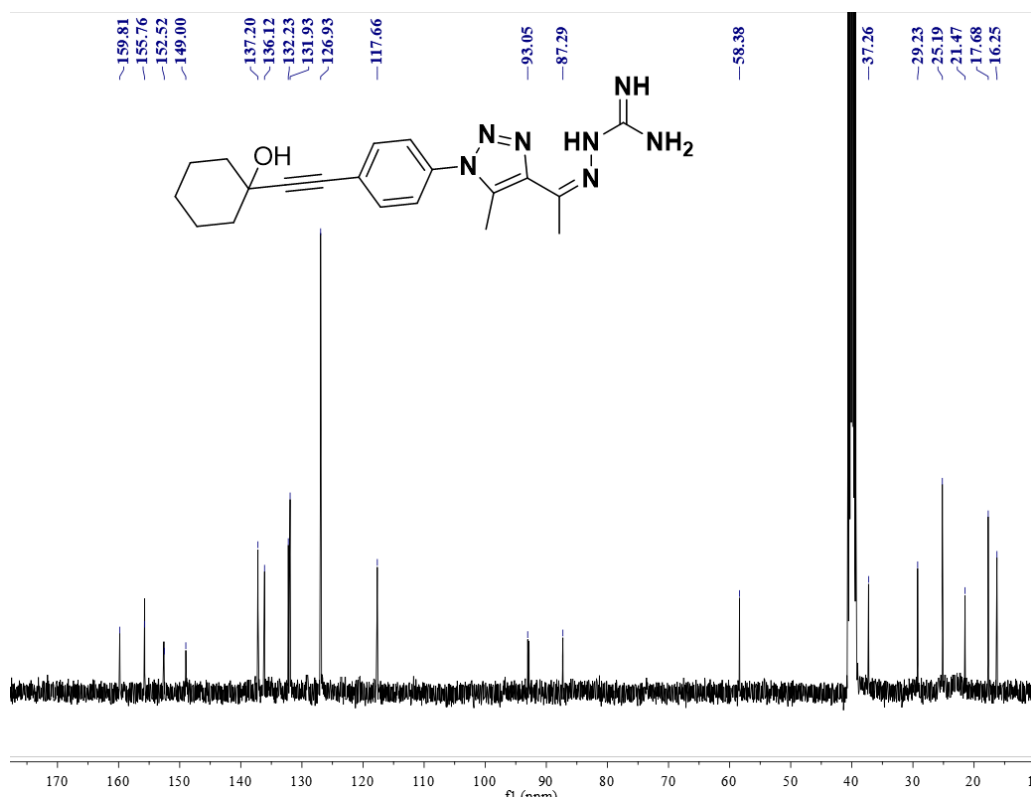

**Figure S6:** <sup>13</sup>C NMR data of compound TRZO

| SAMPLE INFORMATION |                            |                     |                                  |
|--------------------|----------------------------|---------------------|----------------------------------|
| Sample Name:       | SN-3                       | Acquired By:        | System                           |
| Sample Type:       | Unknown                    | Sample Set Name:    | dsrtrr                           |
| Vial:              | 41                         | Acq. Method Set:    | Trial 1 gradient                 |
| Injection #:       | 1                          | Processing Method:  | Default                          |
| Injection Volume:  | 10.00 ul                   | Channel Name:       | 380.0nm                          |
| Run Time:          | 40.0 Minutes               | Proc. Chnl. Descr.: | W2996 PDA 380.0 nm (PDA 210.0 tc |
| Date Acquired:     | 9/23/2021 9:10:13 PM EEST  |                     |                                  |
| Date Processed:    | 9/25/2021 10:21:44 AM EEST |                     |                                  |

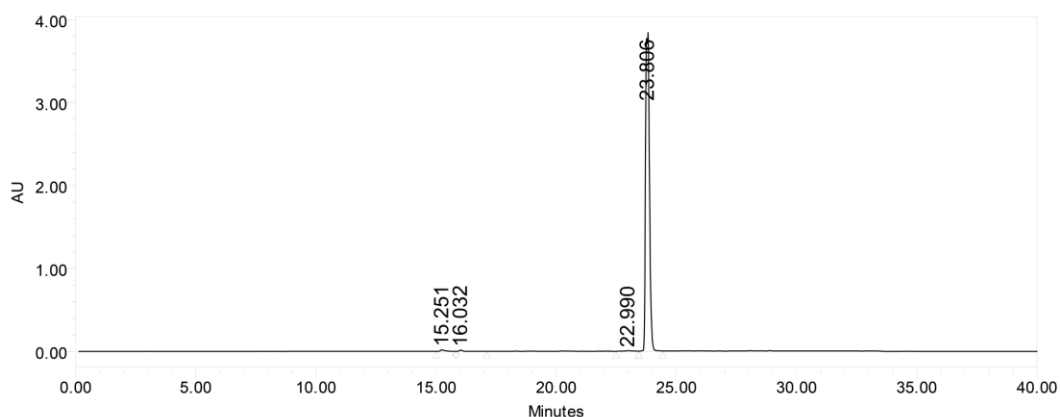

|   | RT     | Area     | % Area | Height  |
|---|--------|----------|--------|---------|
| 1 | 15.251 | 212107   | 0.49   | 17149   |
| 2 | 16.032 | 135351   | 0.31   | 14260   |
| 3 | 22.990 | 84749    | 0.19   | 5648    |
| 4 | 23.806 | 43255800 | 99.01  | 3841452 |

**Figure S7:** HPLC data of compound ACE.

## 1.2. Cell Culture Protocol and MTT assay

The human diploid fibroblast (WI-38) cell line was obtained from the American Type Culture Collection. The cultured cells were grown using DMEM (Invitrogen/Life Technologies) in 10% fetal bovine serum (FBS), 10 µg/ml of insulin (Sigma), and 1% penicillin-streptomycin antibiotics. Other chemicals and reagents were obtained from Sigma or Invitrogen. Cell density was  $1.2 - 1.8 \times 10^3$  cells/well in a volume of 100 µl complete growth medium + 100 µl of the tested compound/well in a 96-well plate for 24 hours, performing assay. After treatment of cells with the tested compounds' serial concentrations, 48 h at 37°C is incubated. Human diploid fibroblast cell



line (WI-38) cells were plated in 96-well microplates at a density of  $1 \times 10^4$  (8000- 10000) cells per well (100  $\mu$ L per well). Control wells contained no drugs, and blank wells contained only growth medium for background correction. After cell attachment, the medium was removed, and cells were incubated with a serum-free medium containing 10000  $\mu$ g/mL of the synthetic compounds by 1/2 serial dilutions according to these concentrations: 16, 32, and 64  $\mu$ g/mL. Nanogels and free compounds were first dissolved in DMSO and then diluted in medium, therefore, the maximum concentration of DMSO in the wells did not exceed 0.5%. Cells were further incubated for 24 h. At the end of the incubation time, the medium was removed, and MTT solution was added to each well at a final concentration of 5 mg/mL, and the plates were incubated for another 4 h at 37 °C. Then, formazan crystals were solubilized in 150  $\mu$ L DMSO. The optical density was measured at 570 nm with background correction at 655 nm using a (STAT-fax 2100) microplate reader (Serial 2100-4019, UK).

### 1.3. Inhibition zone data

The antibacterial activity of three compounds—TRZS, TRZO, and ACE—was evaluated in both nanogel (Ng) and free sample (S) forms against ten standard bacterial strains using the agar well diffusion method. The inhibition zone diameters (mm) revealed that the nanogel formulations consistently outperformed their free counterparts across most strains. ACE-Ng exhibited the highest overall activity, notably against *Bacillus subtilis* (31 mm), *Staphylococcus aureus* MRSA (25 mm), and *Escherichia coli* (20 mm). TRZS-Ng also showed potent effects, particularly against *B. subtilis* (24 mm) and *A. baumannii* (21 mm). TRZO-Ng demonstrated moderate efficacy, with its strongest inhibition observed against *E. coli* (19 mm) and *S. aureus* MRSA (18 mm). In contrast, the free forms generally showed reduced activity, with inhibition zones ranging from 6 to 16 mm. The positive control, chloramphenicol (50  $\mu$ g/mL), yielded the highest inhibition zones in most cases, confirming assay validity.

The enhanced antibacterial activity of nanogel formulations compared to free samples aligns with recent findings on nanocarrier-mediated drug delivery, which improves bioavailability and penetration through bacterial membranes. ACE-Ng's superior performance, especially against Gram-positive strains like *B. subtilis* and *S. aureus* MRSA, suggests a strong interaction with peptidoglycan-rich cell walls, possibly due to optimized release kinetics and surface charge interactions.

Comparing these results with studies from the past four years, particularly those investigating 1,2,4-triazole derivatives, supports the observed efficacy. Strzelecka and Świątek (2021) emphasized the broad-spectrum antibacterial potential of triazole-based compounds, noting their effectiveness against resistant strains such as MRSA and *A. baumannii* (3) Similarly, Jacob et al. demonstrated that triazole derivatives exhibited significant inhibition zones against *S. epidermidis*, *B. subtilis*, and *S. aureus*, consistent with the current data (4) More recently, Zhang et al. (2023) synthesized triazolo[4,3-a]pyrazine derivatives with notable activity against *E. coli* and *S. aureus*, reinforcing the relevance of nitrogen-containing heterocycles in combating multidrug-resistant pathogens (5) The nanogel-enhanced delivery of TRZS, TRZO, and ACE appears to amplify these intrinsic antibacterial properties, offering a promising route for future antimicrobial development. These findings advocate for further exploration into nanocarrier systems to potentiate the efficacy of triazole-based therapeutics, especially against WHO-priority pathogens.

**Table S2:** Antibacterial activities of nanogels (Ng) and free sample (S) of target compounds against different bacterial strains, by agar well diffusion assay (IZD=mm)

| Bacterial strains                | TRZS<br>1000µg/mL             |     | TRZO<br>1000µg/mL |     | ACE<br>1000µg/mL |     | Positive control                                 |
|----------------------------------|-------------------------------|-----|-------------------|-----|------------------|-----|--------------------------------------------------|
|                                  | (Ng)                          | (S) | (Ng)              | (S) | (Ng)             | (S) | chloramphenicol<br>50µg/Ml (Positive<br>control) |
|                                  | Inhibition zone diameter (mm) |     |                   |     |                  |     |                                                  |
| <i>E. coli</i> ATCC 25922        | 17                            | 9   | 19                | 8   | 20               | 6   | 24                                               |
| <i>A. baumannii</i> ATCC 17978   | 21                            | 8   | 14                | 16  | 22               | 12  | 22                                               |
| <i>K. pneumoniae</i> ATCC 700603 | 6                             | 6   | 9                 | 6   | 18               | 6   | 22                                               |
| <i>P. aeruginosa</i> ATCC 25668  | 21                            | 12  | 12                | 6   | 21               | 12  | 23                                               |
| <i>P. mirabilis</i> ATCC 29906   | 11                            | 10  | 15                | 8   | 17               | 6   | 20                                               |
| MRSA ATCC 43300                  | 17                            | 14  | 18                | 19  | 25               | 16  | 27                                               |
| <i>S. epidermidis</i> ATCC 12228 | 20                            | 11  | 20                | 20  | 23               | 26  | 22                                               |
| <i>B. subtilis</i> ATCC 6633     | 24                            | 15  | 18                | 12  | 31               | 19  | 32                                               |

|                              |    |    |    |   |    |    |    |
|------------------------------|----|----|----|---|----|----|----|
| Micrococcus luteus ATCC 9341 | 21 | 15 | 19 | 7 | 20 | 15 | 27 |
| E. feacalis ATCC 29212       | 13 | 12 | 10 | 8 | 20 | 6  | 22 |

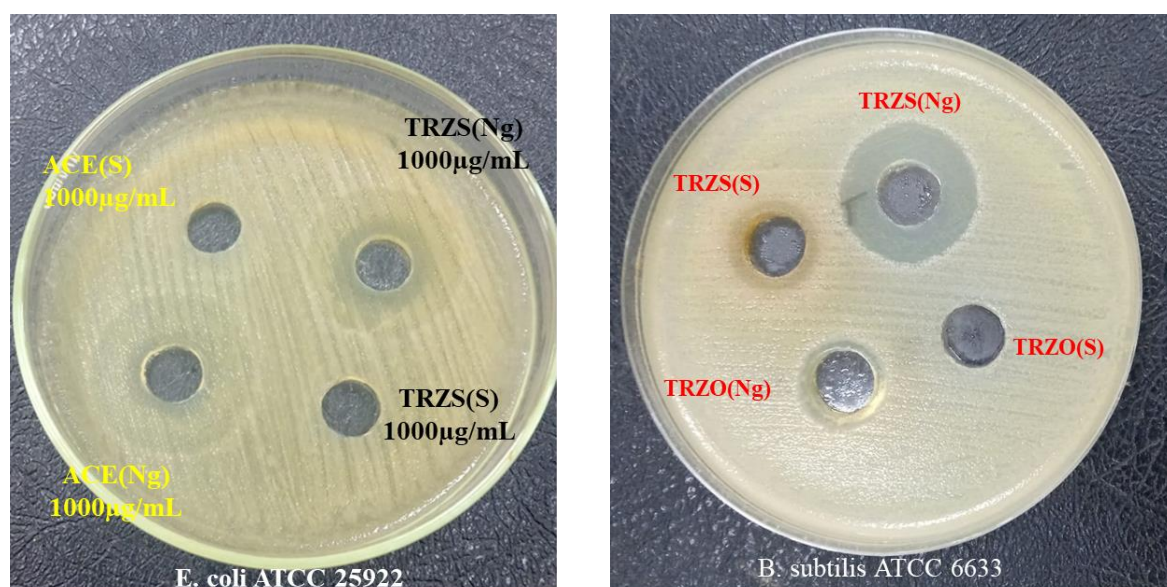

**Figure S8:** Antibacterial activities of nanogels (Ng) and free sample (S) of target compounds against *E. coli* ATCC 25922 (left) and *B. subtilis* ATCC 6633 (right) by agar well diffusion assay (IZD=mm).
